# Supplementary material for: Symmetric star poly(substituted glycolide) homopolymers and their surface properties
Source: Royal Society of Chemistry journal article supplement (doi:10.1039/d4py01229a), 2024-12-10
Supplement: d4py01229a1.pdf [file d4py01229a1.pdf]

## **Symmetric Star Poly(Substituted Glycolide) Homopolymers and Their Surface Properties**

***Yonca Çolak<sup>a</sup>, Sema Nur Belen<sup>b</sup>, Duygu Çetin<sup>a</sup>, Ugur Cengiz<sup>b,c</sup>, and Olcay Mert<sup>a,d\*</sup>***

*<sup>a</sup>Department of Polymer Science and Technology, Kocaeli University, 41001, Kocaeli, Türkiye*

*<sup>b</sup>Department of Energy Resources and Management, Faculty of Engineering, Çanakkale Onsekiz Mart University, Çanakkale, Türkiye*

*<sup>c</sup>Surface Science Research Laboratory, Department of Chemical Engineering, Faculty of Engineering, Çanakkale Onsekiz Mart University, Çanakkale, Türkiye*

*<sup>d</sup>Department of Chemistry, Kocaeli University, 41001, Kocaeli, Türkiye*

\*Corresponding author: E-mail: [olcay.mert@kocaeli.edu.tr](mailto:olcay.mert@kocaeli.edu.tr)

Phone: +90 (262) 303 20 18

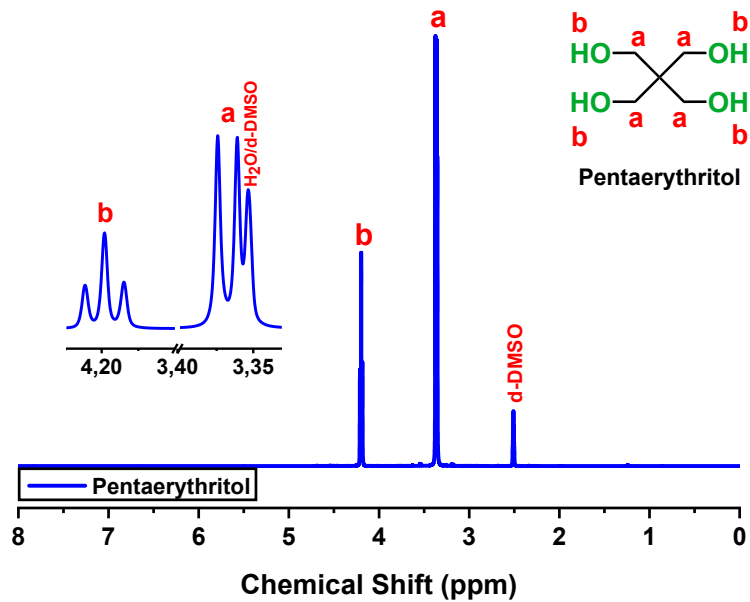

Figure S1. <sup>1</sup>H NMR spectrum of pentaerythritol.

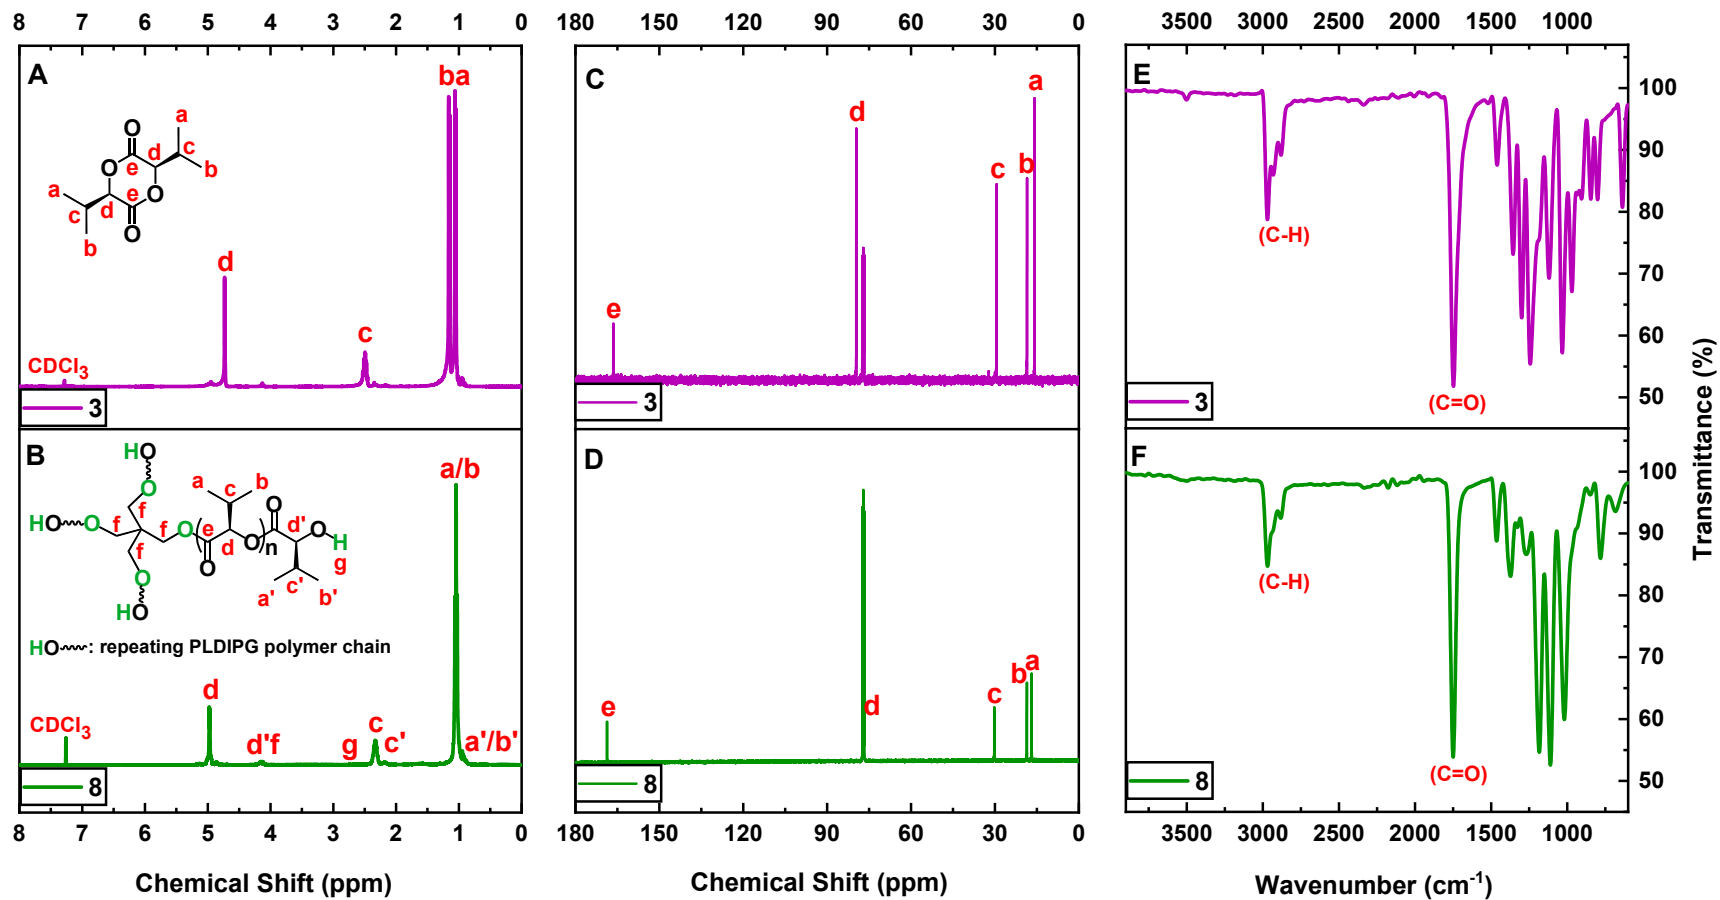

**Figure S2.**  $^1\text{H}$  NMR (A and B),  $^{13}\text{C}$  NMR (C and D), and ATR-FTIR (E and F) full spectra of compounds **3** and **8**, respectively.

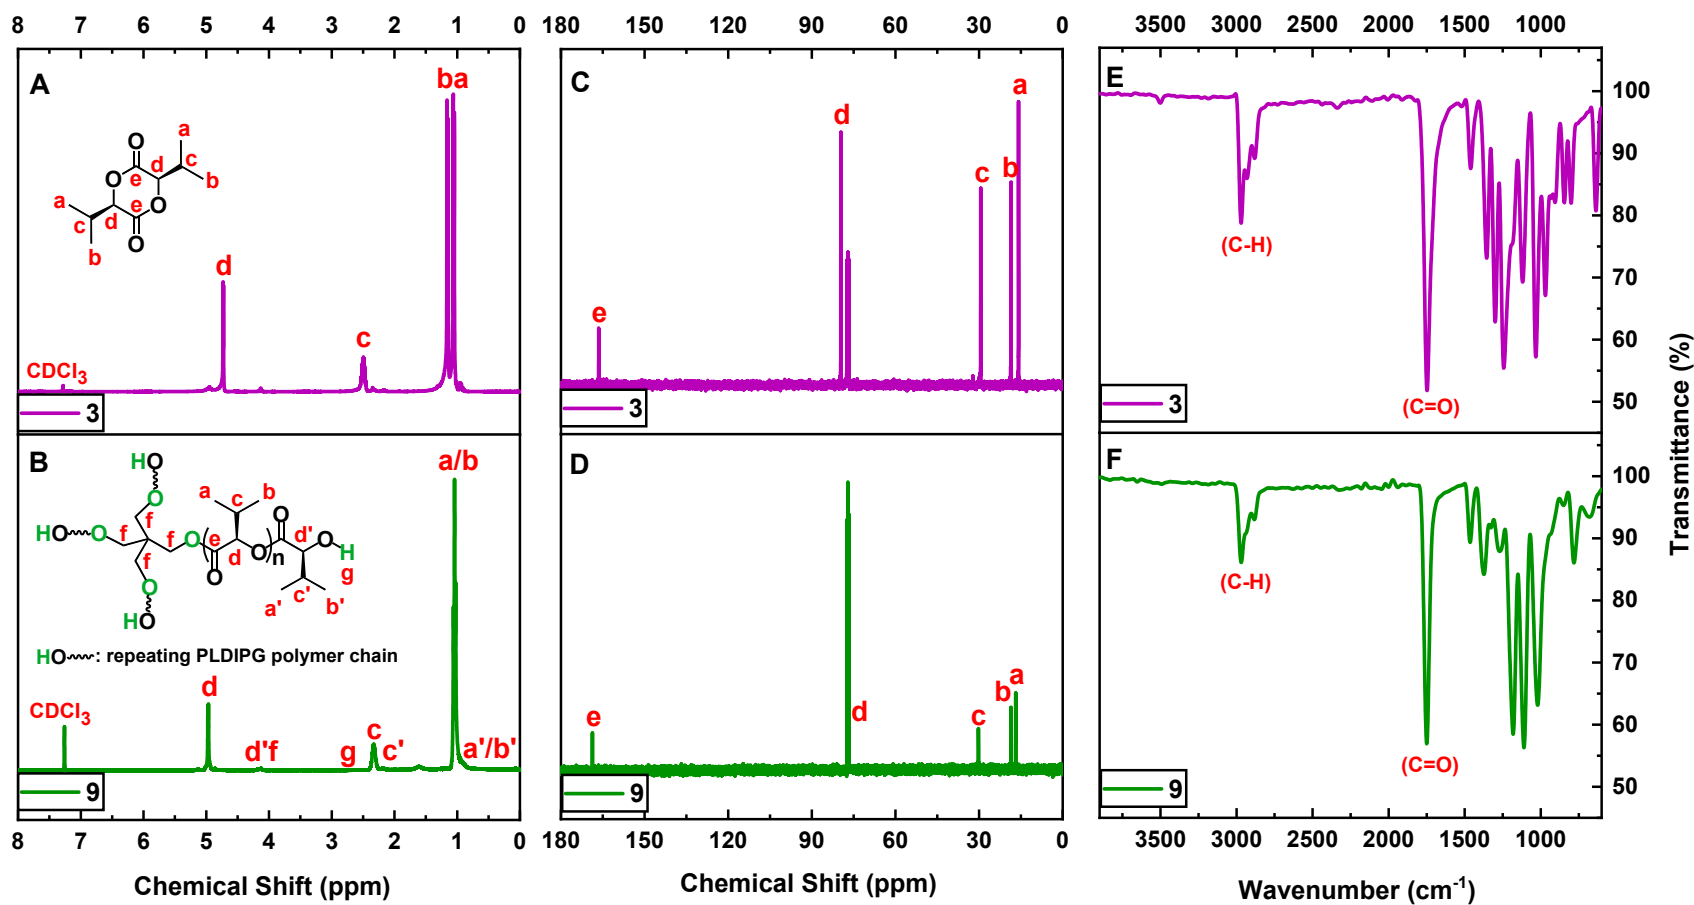

**Figure S3.**  $^1\text{H}$  NMR (A and B),  $^{13}\text{C}$  NMR (C and D), and ATR-FTIR (E and F) full spectra of compounds **3** and **9**, respectively.

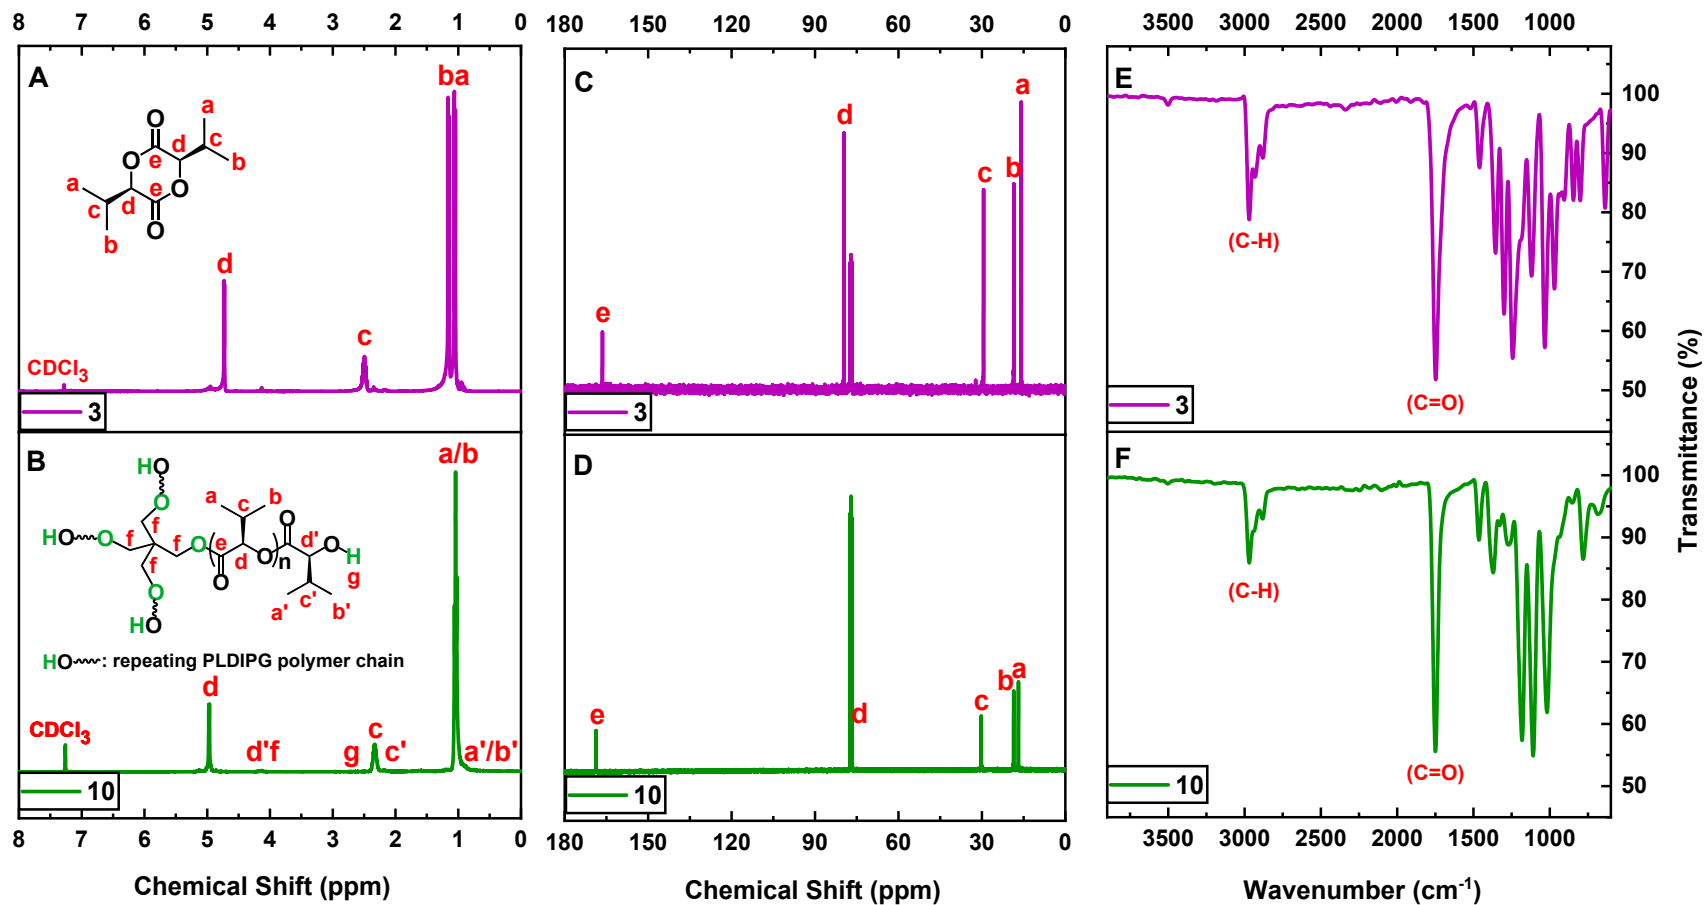

**Figure S4.**  $^1\text{H}$  NMR (A and B),  $^{13}\text{C}$  NMR (C and D), and ATR-FTIR (E and F) full spectra of compounds **3** and **10**, respectively.

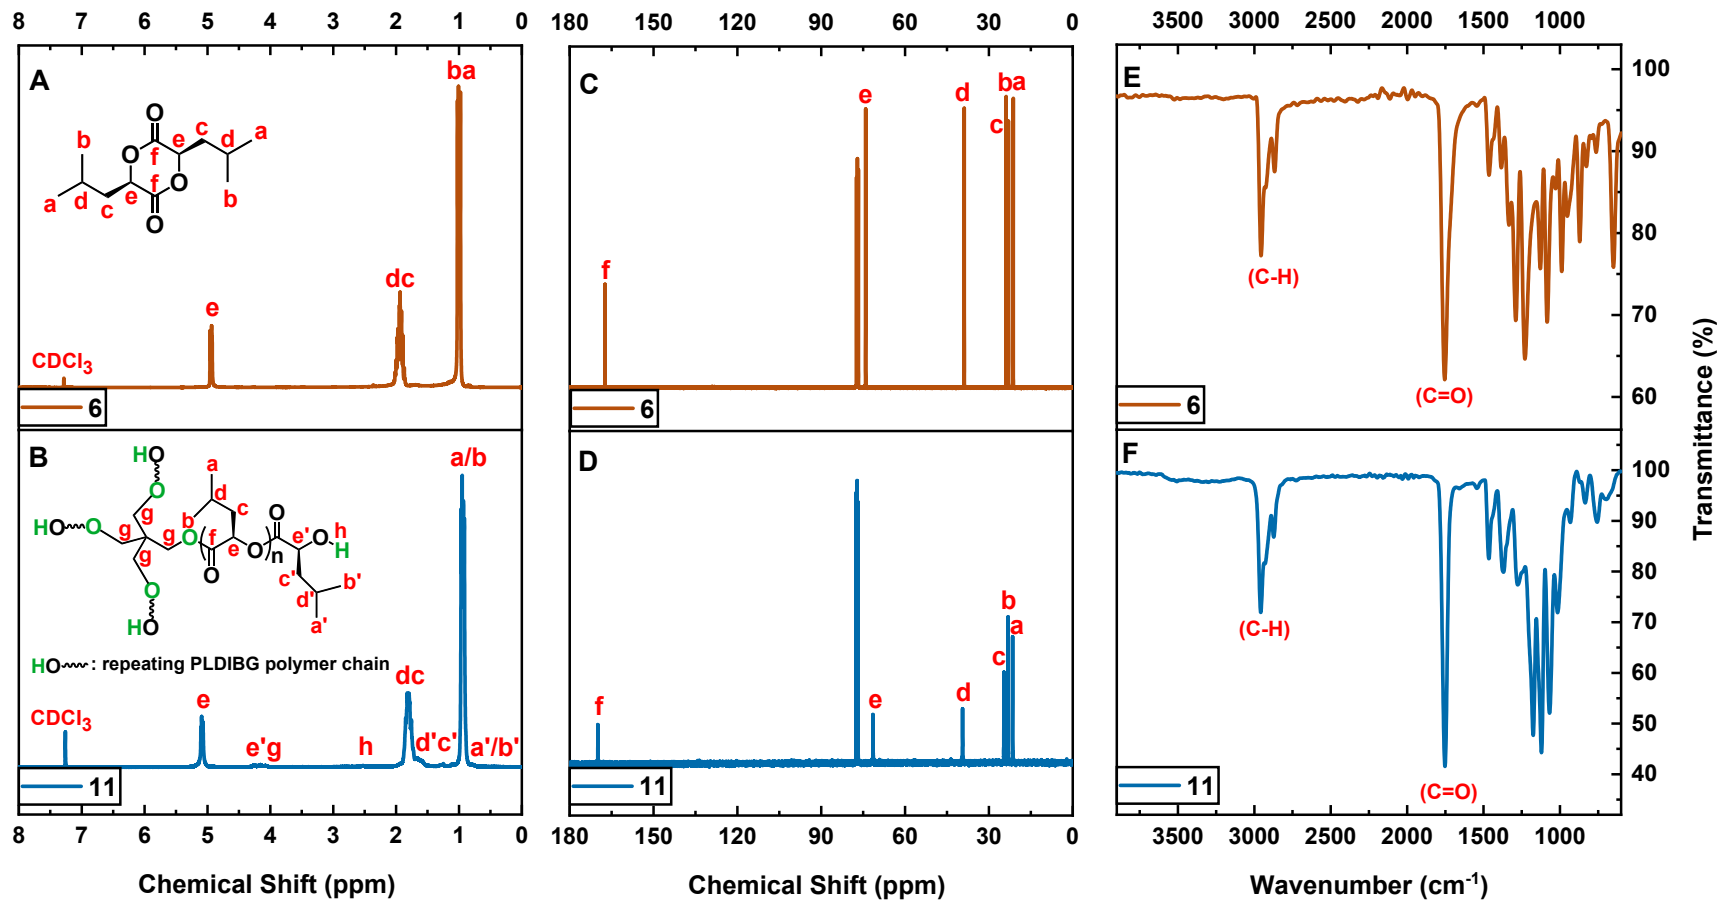

Figure S5.  $^1\text{H}$  NMR (A and B),  $^{13}\text{C}$  NMR (C and D), and ATR-FTIR (E and F) full spectra of compounds 6 and 11, respectively.

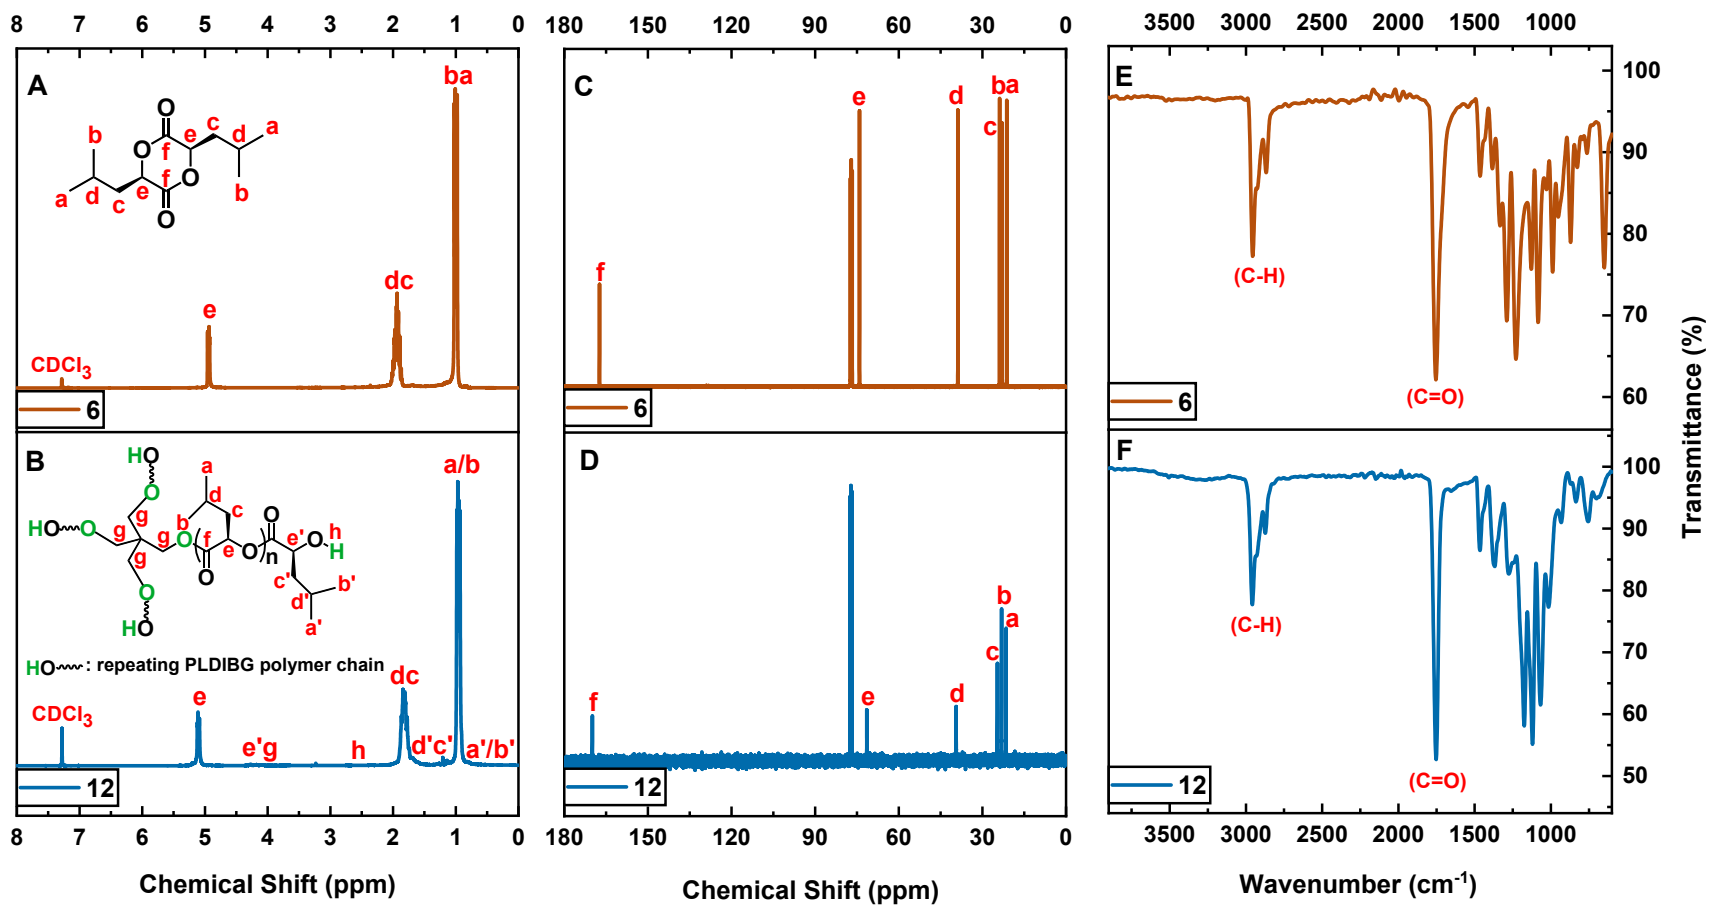

Figure S6.  $^1\text{H}$  NMR (A and B),  $^{13}\text{C}$  NMR (C and D), and ATR-FTIR (E and F) full spectra of compounds 6 and 12, respectively.

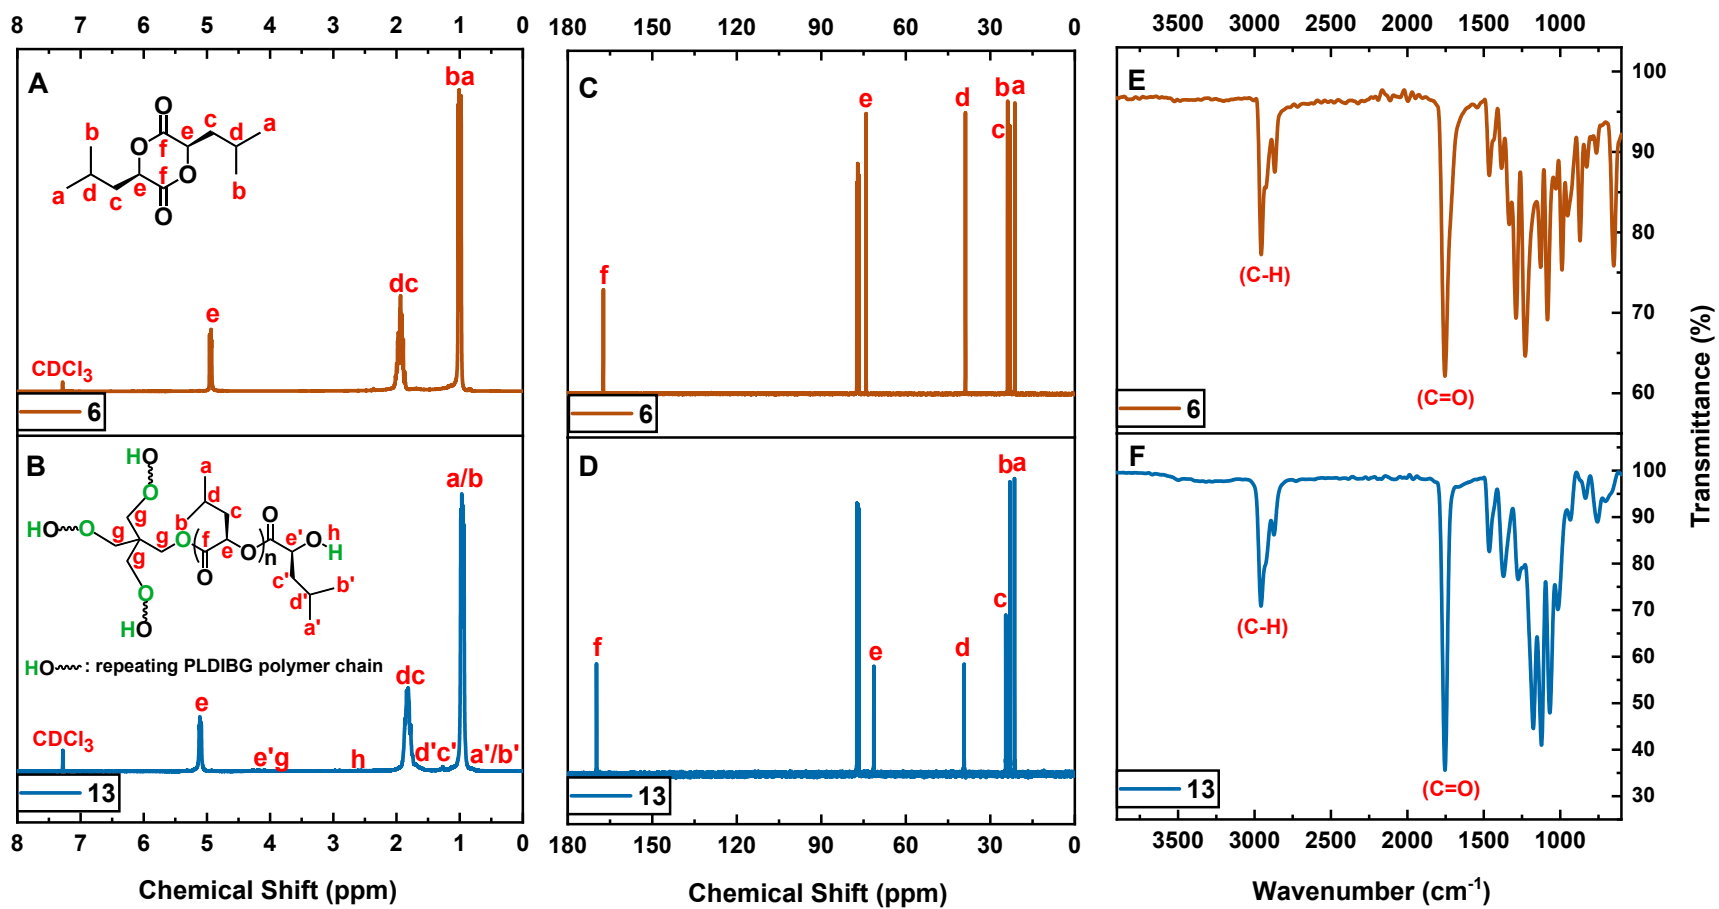

**Figure S7.**  $^1\text{H}$  NMR (A and B),  $^{13}\text{C}$  NMR (C and D), and ATR-FTIR (E and F) full spectra of compounds 6 and 13, respectively.



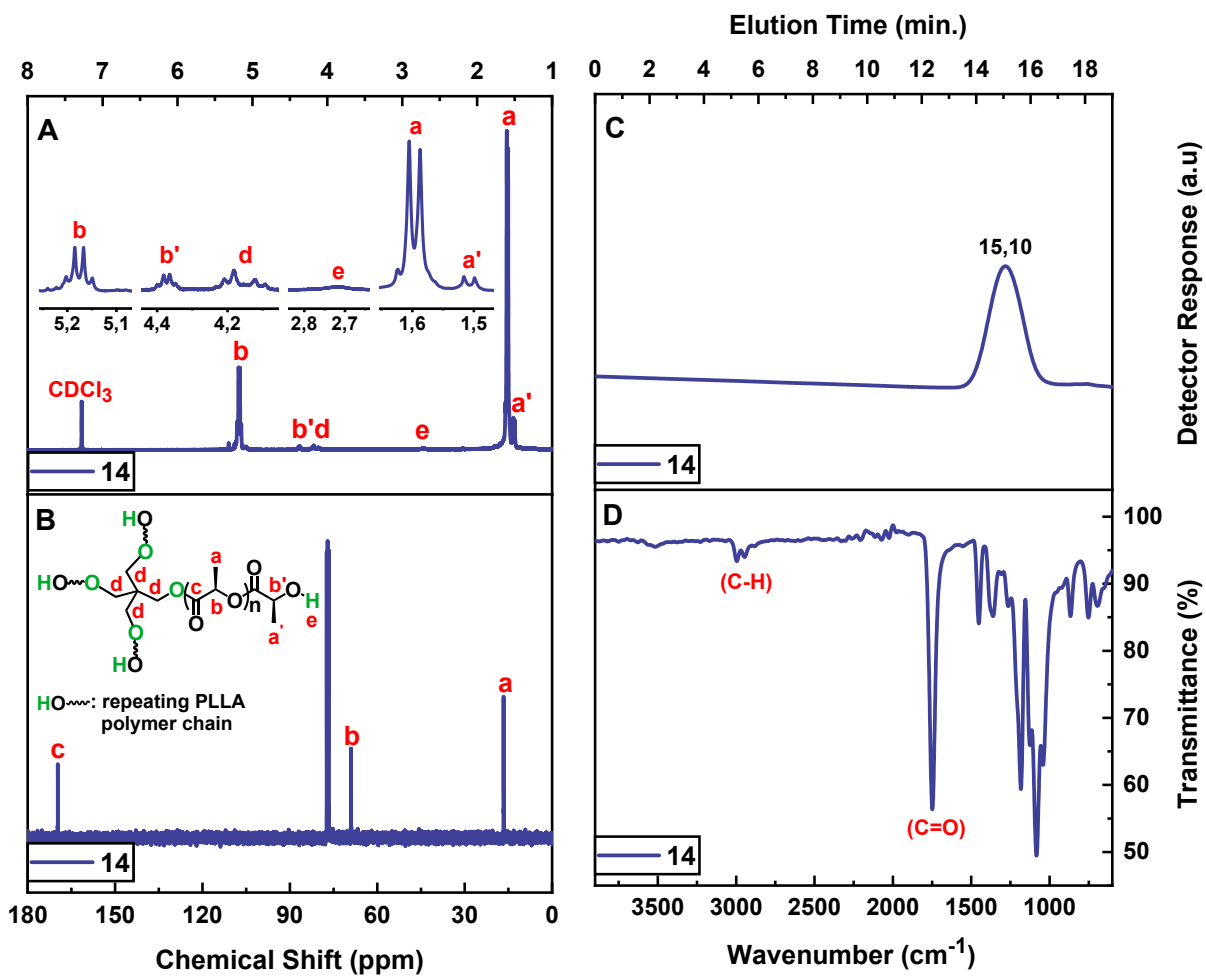

**Figure S8.**  $^1\text{H}$  NMR (A),  $^{13}\text{C}$  NMR (B), GPC (C) and ATR-FTIR (D) full spectra of compound 14, respectively.

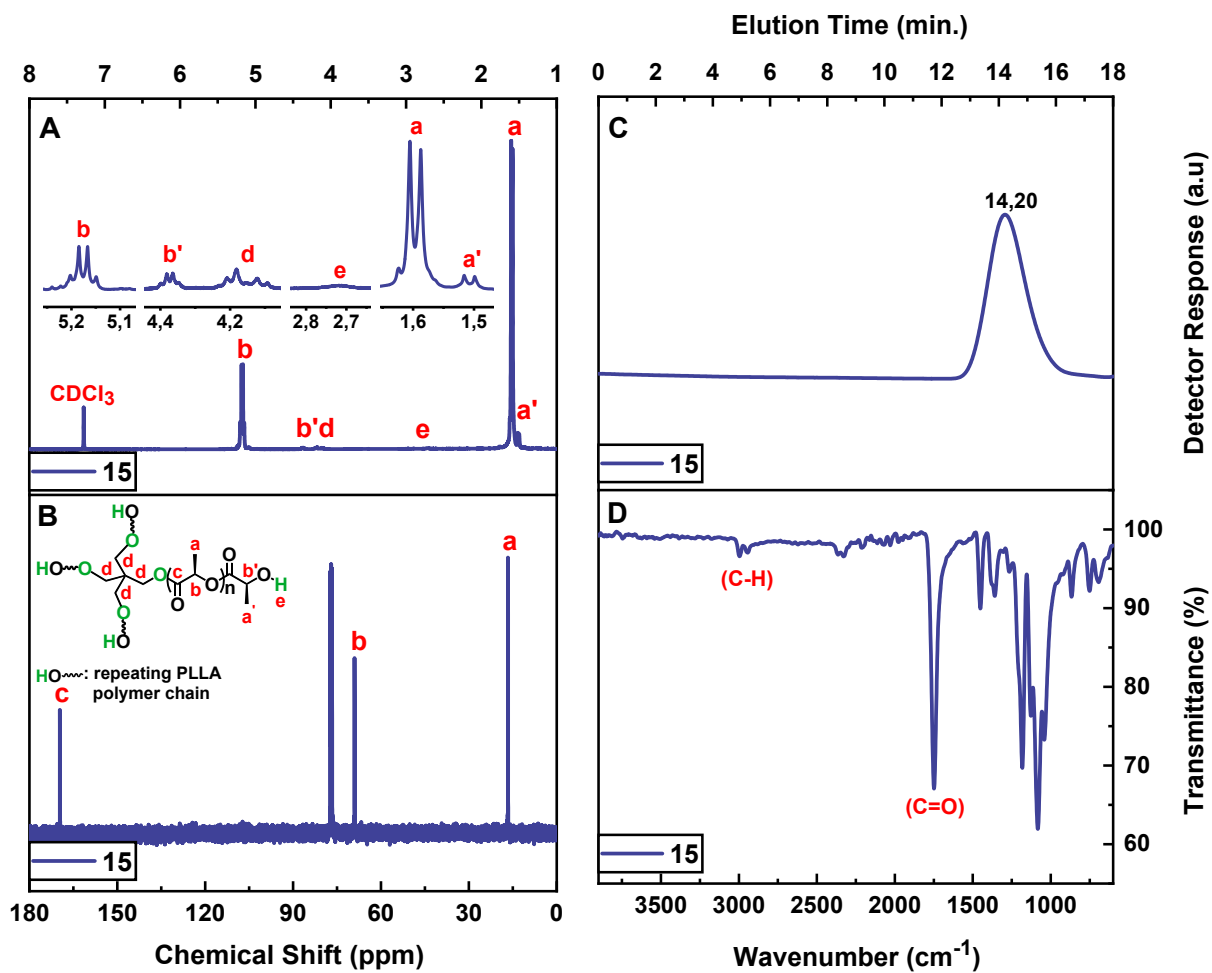

**Figure S9.**  $^1\text{H}$  NMR (A),  $^{13}\text{C}$  NMR (B), GPC (C) and ATR-FTIR (D) full spectra of compound 15, respectively.

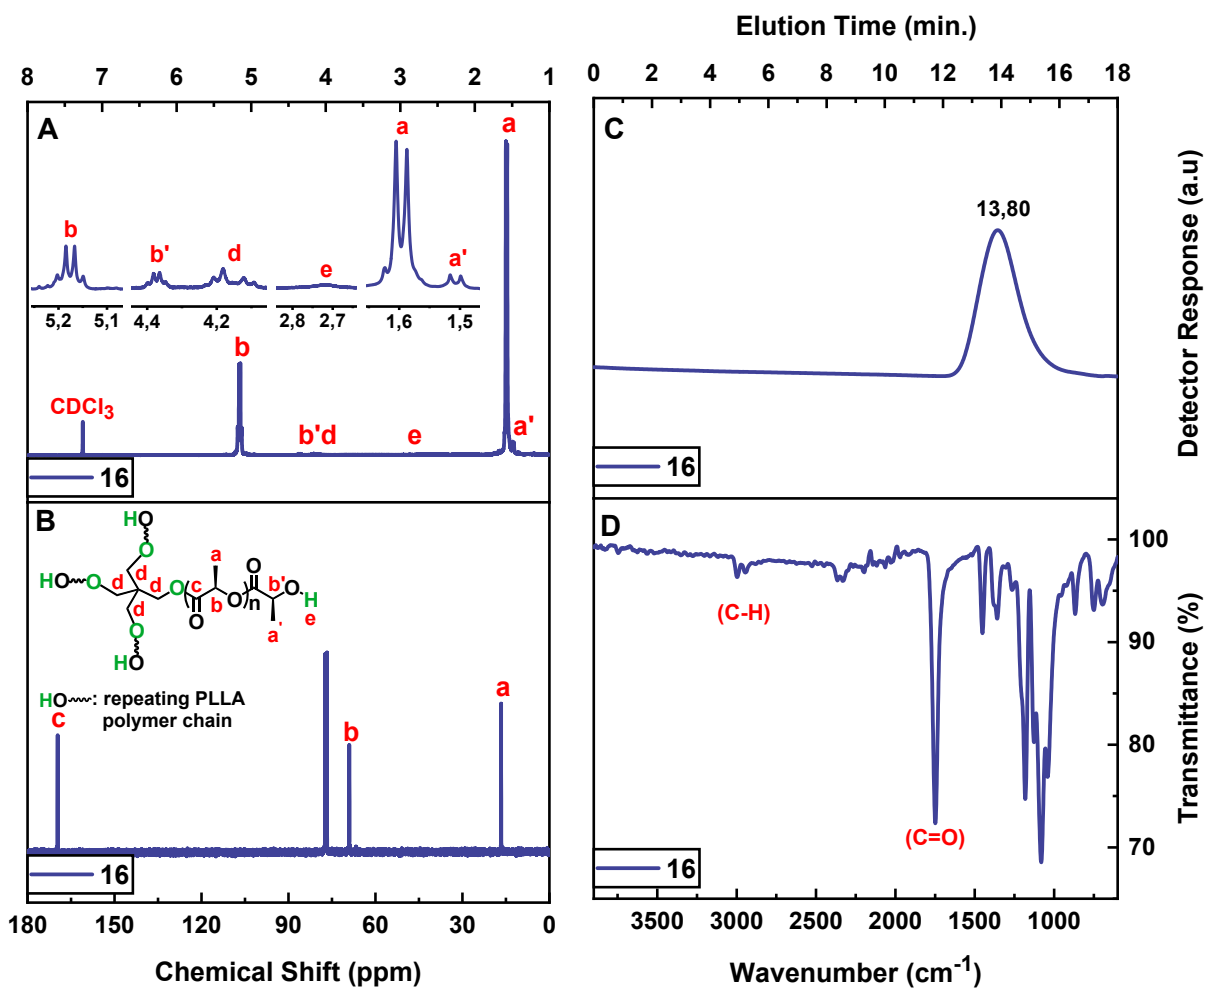

**Figure S10.**  $^1\text{H}$  NMR (A),  $^{13}\text{C}$  NMR (B), GPC (C) and ATR-FTIR (D) full spectra of compound 16, respectively.

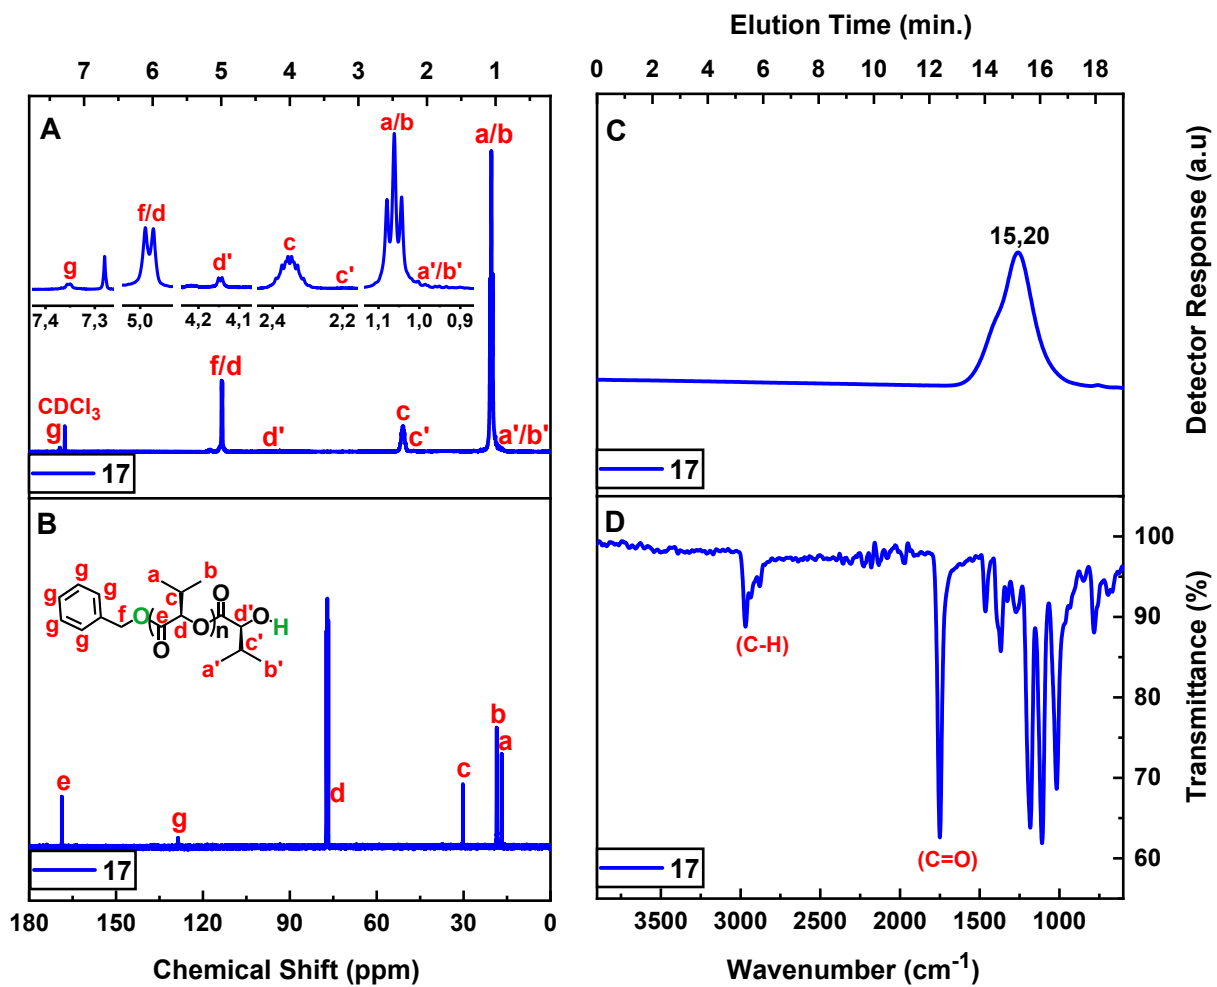

**Figure S11.**  $^1\text{H}$  NMR (A),  $^{13}\text{C}$  NMR (B), GPC (C) and ATR-FTIR (D) full spectra of compound 17, respectively.

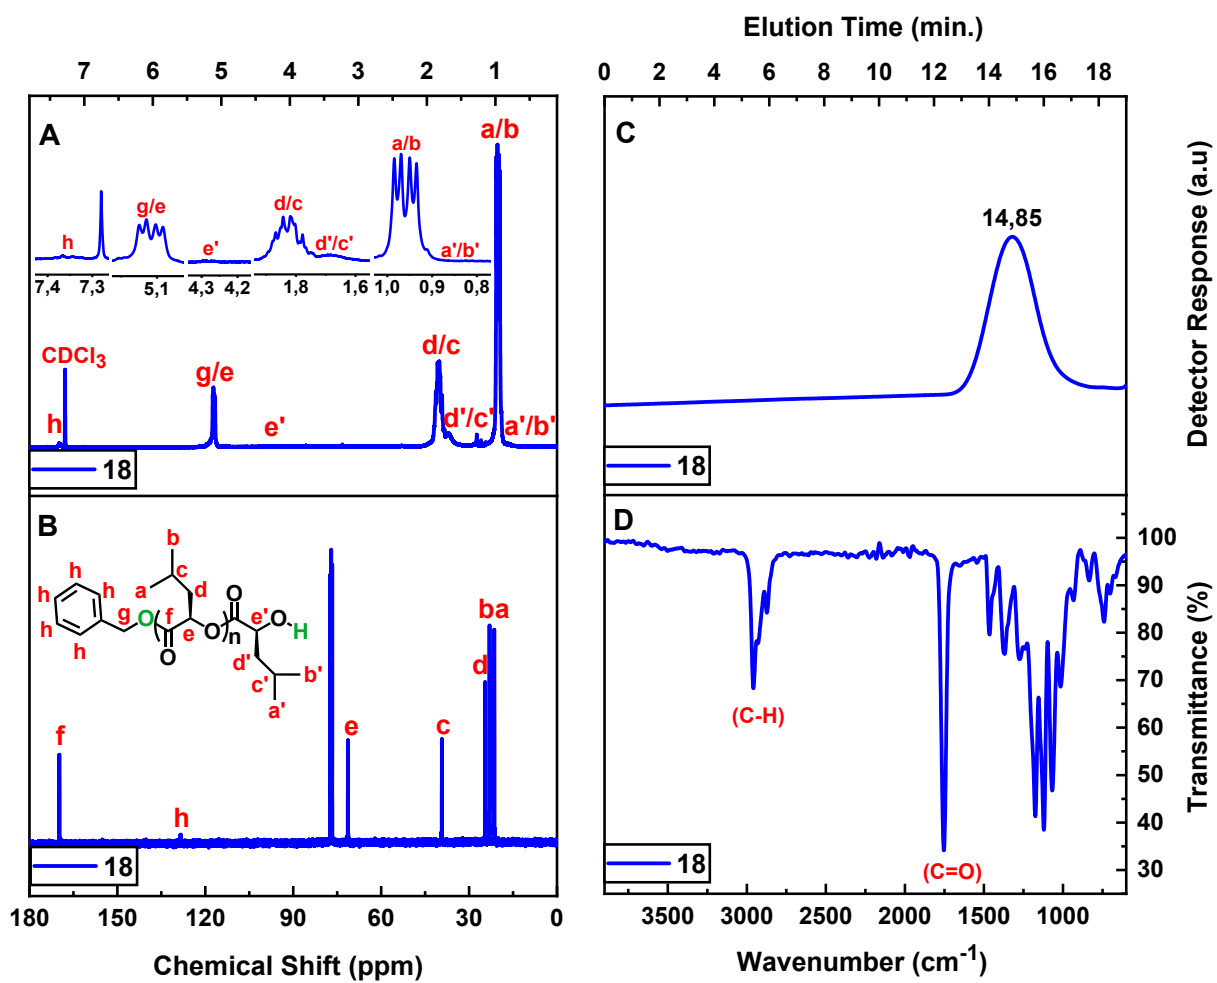

**Figure S12.**  $^1\text{H}$  NMR (A),  $^{13}\text{C}$  NMR (B), GPC (C) and ATR-FTIR (D) full spectra of compound 18, respectively.

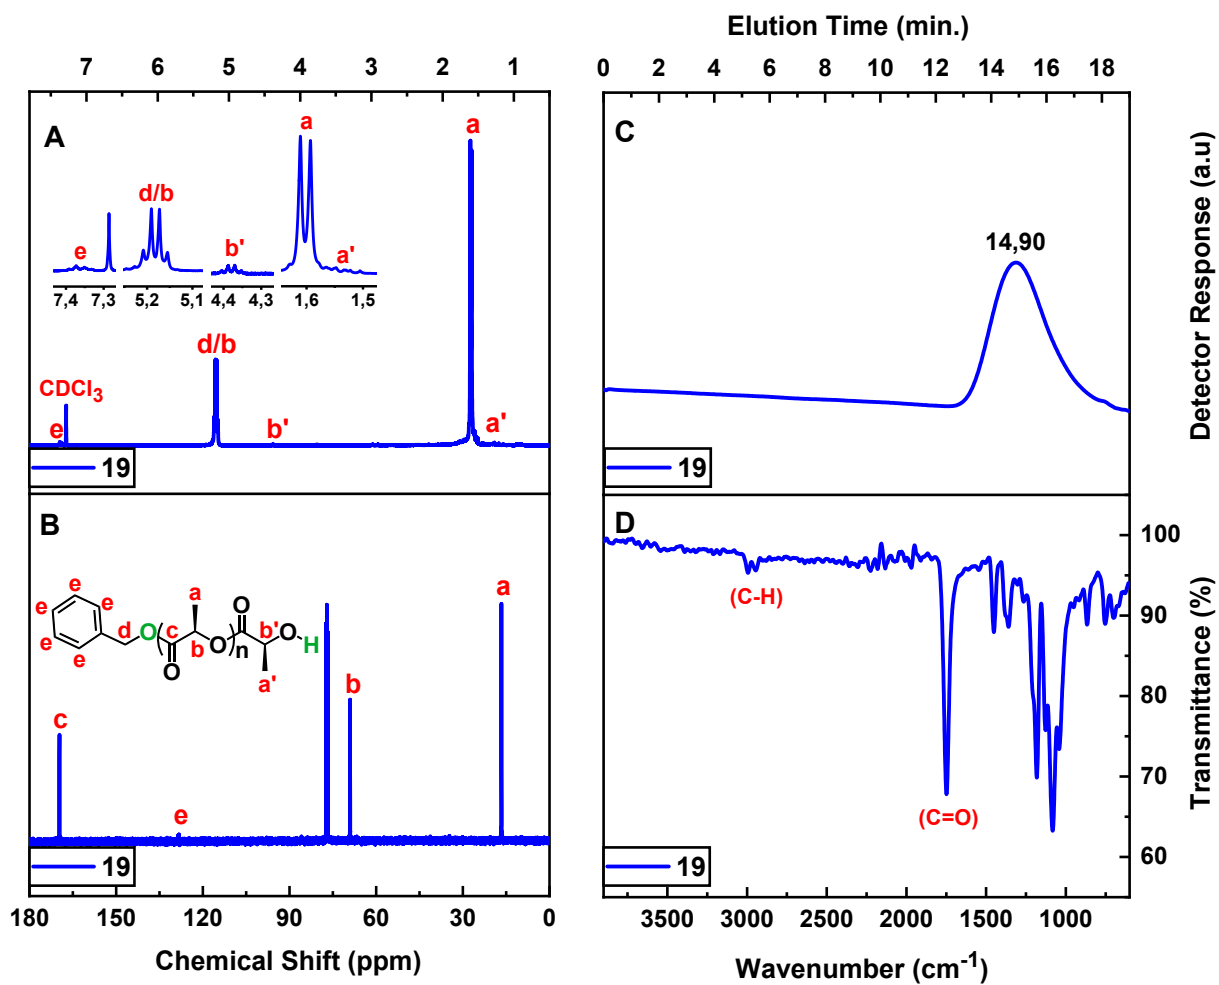

**Figure S13.**  $^1\text{H}$  NMR (A),  $^{13}\text{C}$  NMR (B), GPC (C) and ATR-FTIR (D) full spectra of compound **19**, respectively.

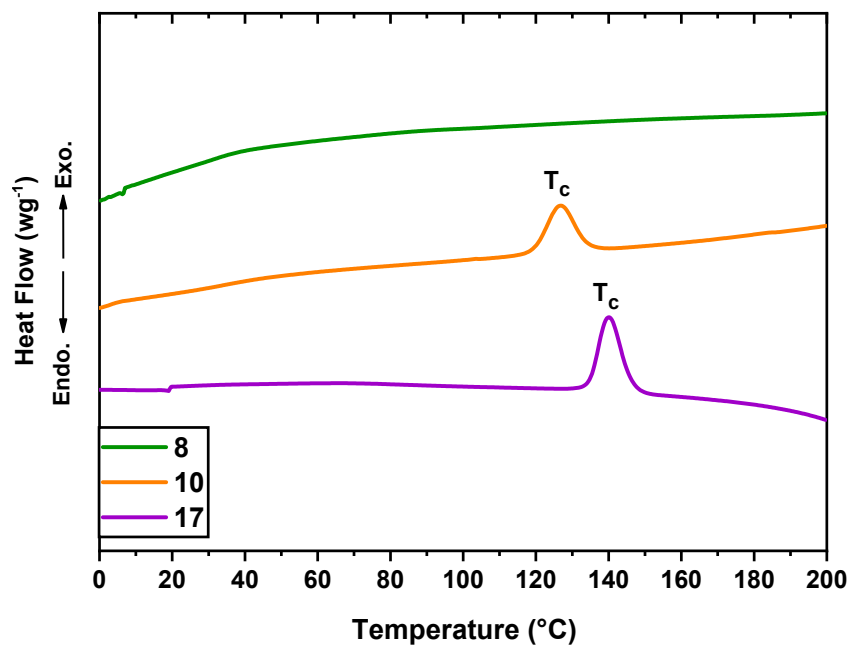

Figure S14. DSC spectrum (cooling run) of compound 8, 10 and 17.

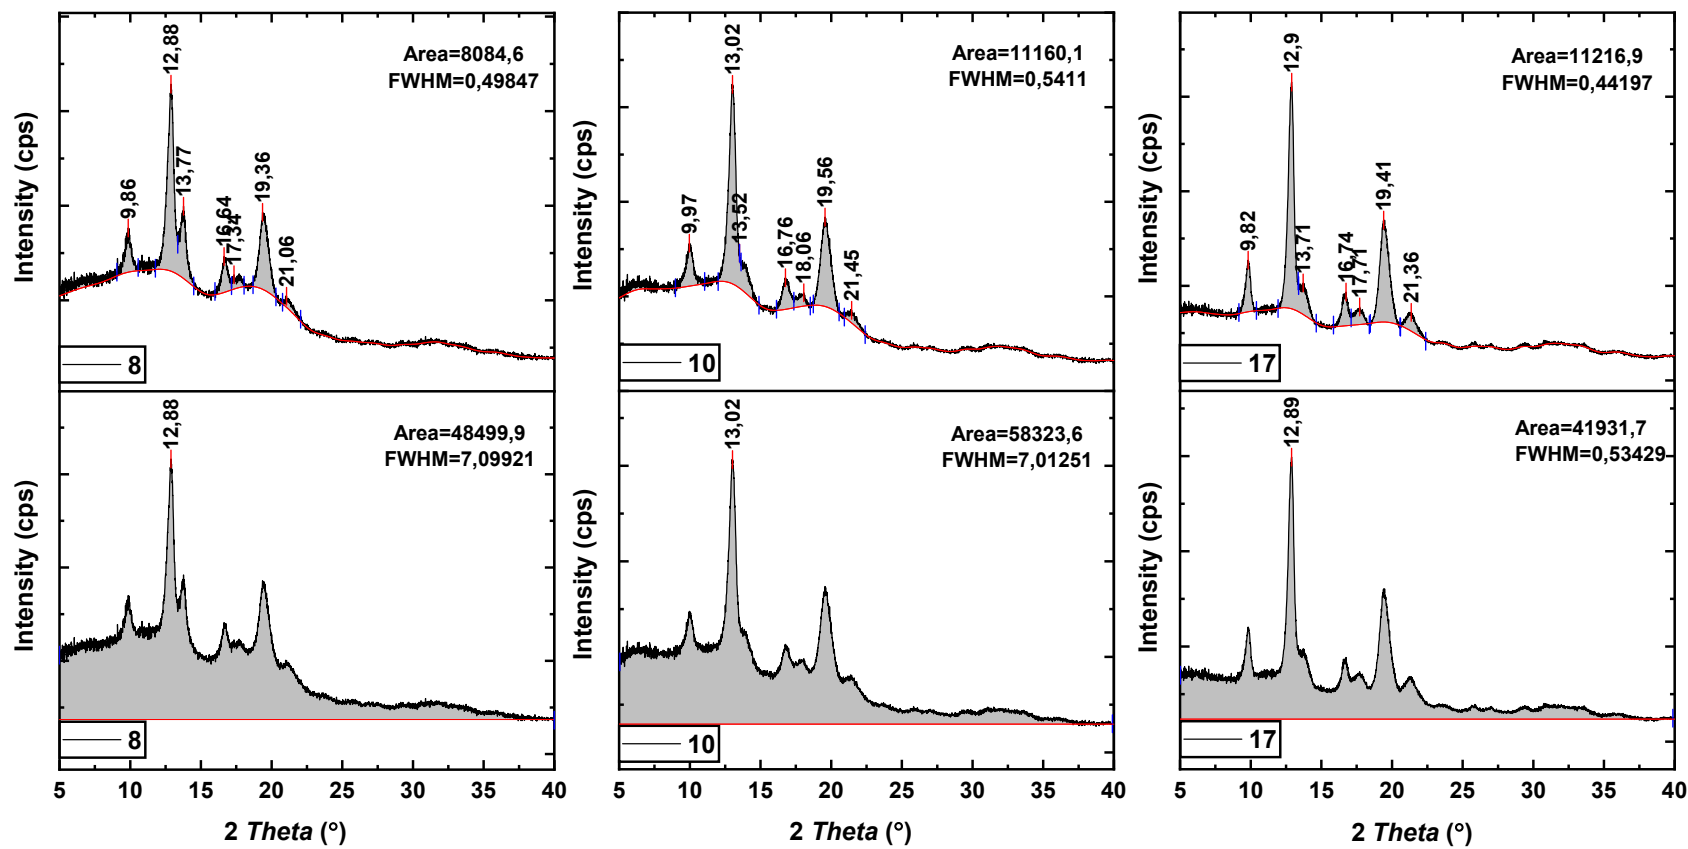

Figure S15. WAXD integral areas for compounds 8, 10 and 17.



**Table S1.** The SEM and AFM images of linear and star PLLA homopolymers.

| Code                          | Chemical Structure                                                                 | AFM Images                                                                          | SEM Images                                                                           |
|-------------------------------|------------------------------------------------------------------------------------|-------------------------------------------------------------------------------------|--------------------------------------------------------------------------------------|
| <b>19</b><br>(PLLA, n=40)     | 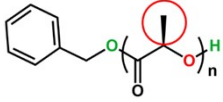  |   |   |
| <b>14</b><br>(4s-PLLA, n=40)  |   |   |   |
| <b>16</b><br>(4s-PLLA, n=120) |  |  |  |

The red circle emphasized the length of the side chain in the repeating unit.
